# Supplementary material
Source: Research Square preprint supplement (doi:10.21203/rs.3.rs-7035279/v1)
Supplement: Supplementary file 1 [file c78230b00352c1417d6d933d.docx]

**Table S1** Microstate parameters per microstate class: means, standard deviations

| **Variable** | **PD** | **GAD** | **HC** | **ADs** |
| --- | --- | --- | --- | --- |
| Mean Duration (ms) | | | | |
| A | 61.99 (1.37) | 62.99(1.46) | 63.54(1.30) | 62.46(0.73) |
| B | 60.70 (1.26) | 60.83(1.34) | 61.65(1.19) | 60.76(0.73) |
| C | 65.88 (2.28) | 67.34(2.42) | 62.28(2.16) | 66.57(1.47) |
| D | 71.29 (2.75) | 75.70(2.93) | 65.12(2.61) | 73.36(1.80) |
| Time coverage (%) | | | | |
| A | 21.98(7.00) | 21.57(6.01) | 24.81(6.92) | 21.79(6.51) |
| B | 22.85(5.26) | 21.75(6.84) | 24.61(5.29) | 22.33(6.03) |
| C | 26.22(8.22) | 27.58(7.43) | 25.36(6.96) | 26.86(7.83) |
| D | 28.96(8.77) | 29.10(10.19) | 25.23(7.99) | 29.02(9.39) |
| Occurrence | | | | |
| A | 3.50(0.15) | 3.41(0.16) | 3.87(0.14) | 3.46(0.09) |
| B | 3.75(0.14) | 3.53(0.15) | 3.98(0.13) | 3.64(0.09) |
| C | 3.93(0.12) | 4.08(0.13) | 4.04(0.12) | 4.00(0.07) |
| D | 4.02(0.13) | 3.83(0.14) | 3.83(0.12) | 3.93(0.07) |
| Mean GFP | | | | |
| A | 4.21(1.28) | 4.06(1.47) | 3.86(1.01) | 4.17(1.37) |
| B | 4.54(1.32) | 4.19(1.36) | 4.05(1.17) | 4.38(1.34) |
| C | 5.06(1.62) | 4.81(1.75) | 4.42(1.30) | 4.94(1.68) |
| D | 4.99(1.46) | 4.82(1.75) | 4.35(1.38) | 4.91(1.59) |

GAD: generalized anxiety disorder, PD: panic disorder; HC: healthy controls; ADs: anxiety disorders; GFP: global field power

**Table S2** Correlation analysis in anxiety disorders

| Variable | PSWQ | | S-AI | | T-AI | | HAMD | |
| --- | --- | --- | --- | --- | --- | --- | --- | --- |
| R | *P* | R | *P* | R | *P* | R | *P* |
| Mean Duration A | 0.047 | 0.714 | 0.001 | 0.551 | -0.026 | 0.842 | 0.075 | 0.554 |
| Mean Duration B | -0.109 | 0.398 | -0.123 | 0.342 | -0.059 | 0.651 | 0.176 | 0.112 |
| Mean Duration C | 0.179 | 0.164 | 0.166 | 0.197 | 0.351 | 0.005 | 0.159 | 0.206 |
| Mean Duration D | 0.128 | 0.322 | 0.053 | 0.681 | 0.196 | -0.179 | 0.181 | 0.149 |
| Occurrence A | -0.186 | 0.148 | -0.060 | 0.642 | -0.272 | 0.033 | -0.175 | 0.162 |
| Occurrence B | -0.236 | 0.063 | -0.192 | 0.135 | -0.310 | 0.014 | -0.086 | 0.496 |
| Occurrence C | 0.202 | 0.116 | 0.247 | 0.053 | 0.178 | 0.167 | -0.109 | 0.389 |
| Occurrence D | -0.081 | 0.531 | -0.230 | 0.073 | -0.179 | 0.164 | -0.244 | 0.051 |
| Time coverage A | -0.138 | 0.284 | -0.053 | 0.682 | -0.247 | 0.053 | -0.129 | 0.307 |
| Time coverage B | -0.276 | 0.030 | -0.202 | 0.115 | -0.276 | 0.030 | 0.057 | 0.654 |
| Time coverage C | 0.241 | 0.059 | 0.249 | 0.052 | 0.353 | 0.005 | 0.039 | 0.755 |
| Time coverage D | 0.067 | 0.603 | -0.049 | 0.707 | 0.062 | 0.634 | 0.021 | 0.868 |

PSWQ: Penn State Worry Questionnaire; S-AI: State- Anxiety Inventory; T-AI: Trait- Anxiety Inventory; HAMD: Hamilton Rating Scale for Depression

**Table S3** Correlation analysis in PD

| Variable | PDSS | | S-AI | | T-AI | | PSWQ | | HAMD | |
| --- | --- | --- | --- | --- | --- | --- | --- | --- | --- | --- |
| R | *P* | R | *P* | R | *P* | R | *P* | R | *P* |
| Mean Duration A | 0.383 | 0.023 | -0.035 | 0.853 | -0.085 | 0.648 | 0.011 | 0.951 | 0.043 | 0.808 |
| Mean Duration B | 0.093 | 0.580 | -0.020 | 0.916 | -0.049 | 0.792 | -0.291 | 0.101 | -0.322 | 0.054 |
| Mean Duration C | 0.076 | 0.664 | 0.360 | 0.047 | 0.494 | 0.005 | 0.356 | 0.042 | 0.185 | 0.287 |
| Mean Duration D | -0.030 | 0.863 | 0.075 | 0.688 | 0.179 | 0.335 | 0.163 | 0.363 | 0.099 | 0.573 |
| Occurrence A | 0.206 | 0.236 | -0.177 | 0.342 | -0.364 | 0.044 | -0.245 | 0.169 | -0.120 | 0.494 |
| Occurrence B | -0.174 | 0.319 | -0.255 | 0.167 | -0.405 | 0.024 | -0.498 | 0.003 | -0.054 | 0.758 |
| Occurrence C | -0.098 | 0.575 | 0.299 | 0.102 | 0.283 | 0.122 | 0.321 | 0.069 | -0.065 | 0.711 |
| Occurrence D | -0.231 | 0.181 | -0.345 | 0.057 | -0.173 | 0.351 | -0.025 | 0.891 | -0.266 | 0.012 |
| Time coverage A | 0.293 | 0.088 | -0.162 | 0.385 | -0.330 | 0.070 | -0.194 | 0.279 | -0.096 | 0.583 |
| Time coverage B | -0.105 | 0.550 | -0.225 | 0.215 | -0.385 | 0.033 | -0.547 | 0.001 | 0.124 | 0.479 |
| Time coverage C | 0.003 | 0.988 | 0.407 | 0.023 | 0.497 | 0.005 | 0.419 | 0.015 | 0.086 | 0.623 |
| Time coverage D | -0.174 | 0.319 | -0.114 | 0.542 | 0.030 | 0.874 | 0.111 | 0.539 | -0.078 | 0.655 |

PSWQ: Penn State Worry Questionnaire; S-AI: State- Anxiety Inventory; T-AI: Trait- Anxiety Inventory; HAMD: Hamilton Rating Scale for Depression

**Table S4** Correlation analysis in GAD

| Variable | HAMA | | S-AI | | T-AI | | PSWQ | | HAMD | |
| --- | --- | --- | --- | --- | --- | --- | --- | --- | --- | --- |
| R | *P* | R | *P* | R | *P* | R | *P* | R | *P* |
| Mean Duration A | -0.318 | 0.121 | 0.040 | 0.831 | 0.055 | 0.771 | 0.067 | 0.728 | 0.103 | 0.587 |
| Mean Duration B | -0.093 | 0.657 | -0.222 | 0.229 | -0.070 | 0.708 | 0.180 | 0.350 | 0.205 | 0.278 |
| Mean Duration C | 0.126 | 0.550 | -0.079 | 0.673 | 0.130 | 0.485 | -0.186 | 0.334 | 0.101 | 0.597 |
| Mean Duration D | -0.362 | 0.075 | 0.033 | 0.861 | 0.226 | 0.222 | 0.015 | 0.940 | 0.263 | 0.161 |
| Occurrence A | 0.072 | 0.732 | 0.083 | 0.656 | -0.134 | 0.474 | -0.061 | 0.754 | -0.261 | 0.163 |
| Occurrence B | 0.076 | 0.716 | -0.133 | 0.474 | -0.218 | 0.238 | 0.116 | 0.550 | -0.095 | 0.618 |
| Occurrence C | 0.673 | 0.000 | 0.194 | 0.296 | 0.052 | 0.782 | -0.003 | 0.987 | -0.200 | 0.289 |
| Occurrence D | -0.330 | 0.107 | -0.052 | 0.781 | -0.178 | 0.339 | -0.080 | 0.678 | -0.162 | 0.391 |
| Time coverage A | -0.068 | 0.748 | 0.094 | 0.615 | -0.109 | 0.560 | 0.002 | 0.992 | -0.187 | 0.322 |
| Time coverage B | 0.006 | 0.976 | -0.179 | 0.335 | -0.197 | 0.289 | 0.177 | 0.359 | 0.010 | 0.958 |
| Time coverage C | 0.478 | 0.016 | 0.070 | 0.708 | 0.129 | 0.490 | -0.135 | 0.485 | -0.065 | 0.734 |
| Time coverage D | -0.064 | 0.760 | 0.014 | 0.941 | 0.103 | 0.583 | -0.010 | 0.961 | 0.149 | 0.431 |

PSWQ: S-AI: State- Anxiety Inventory; T-AI: Trait- Anxiety Inventory; HAMA: Hamilton Rating Scale for Anxiety; HAMD: Hamilton Rating Scale for Depression
